# Supplementary material
Source: publisher site journal article supplement (http://e-cmh.org/upload/media/cmh-2023-0076-Supplementary-Fig-1.pdf)
Supplement: Supplementary file 1 [file cmh-2023-0076-Supplementary-Fig-1.pdf]

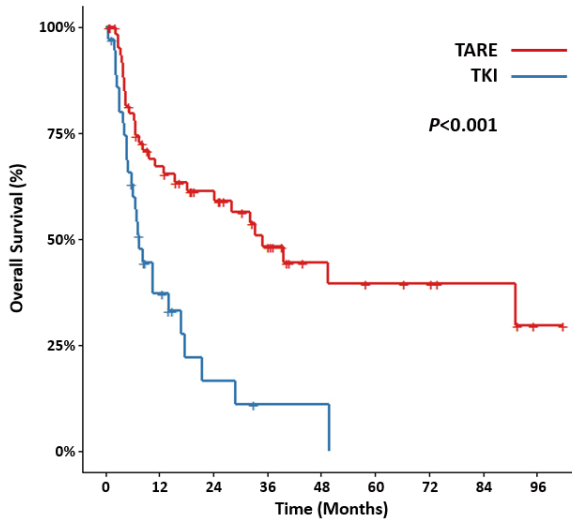

Number at risk

|      |    |    |    |    |   |   |   |   |   |
|------|----|----|----|----|---|---|---|---|---|
| TARE | 62 | 36 | 27 | 17 | 9 | 7 | 6 | 4 | 1 |
| TKI  | 36 | 10 | 3  | 1  | 1 | 0 | 0 | 0 | 0 |

**A** Unmatched, Vp1 + Vp2 subgroup

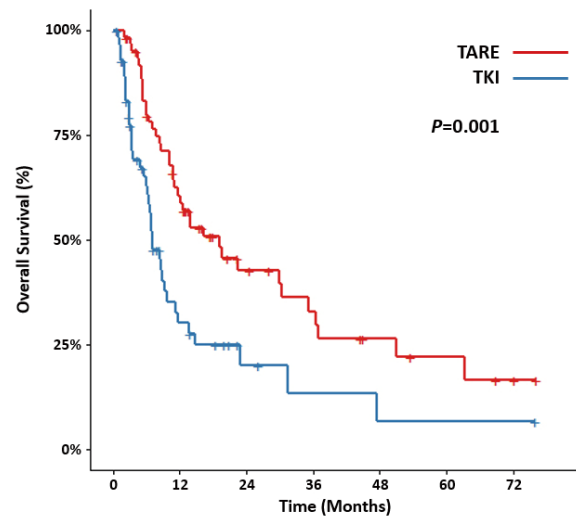

Number at risk

|      |    |    |    |    |   |   |   |
|------|----|----|----|----|---|---|---|
| TARE | 62 | 34 | 15 | 10 | 6 | 4 | 2 |
| TKI  | 56 | 12 | 4  | 2  | 1 | 1 | 1 |

**B** Unmatched, Vp3 subgroup

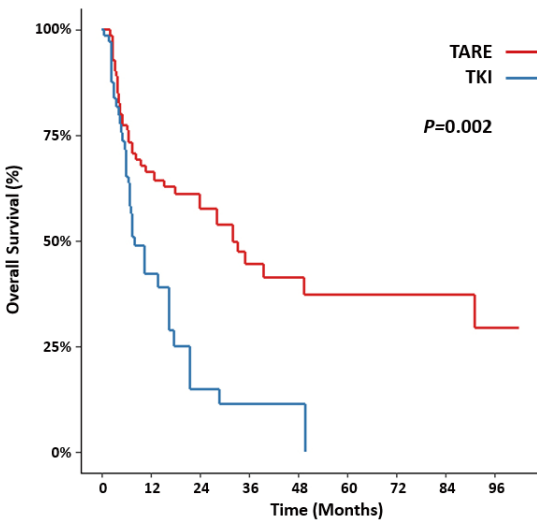

Number at risk

|      |    |    |    |    |   |   |   |   |   |
|------|----|----|----|----|---|---|---|---|---|
| TARE | 62 | 36 | 27 | 17 | 9 | 7 | 6 | 4 | 1 |
| TKI  | 36 | 10 | 3  | 1  | 1 | 0 | 0 | 0 | 0 |

**C** IPTW, Vp1 + Vp2 subgroup

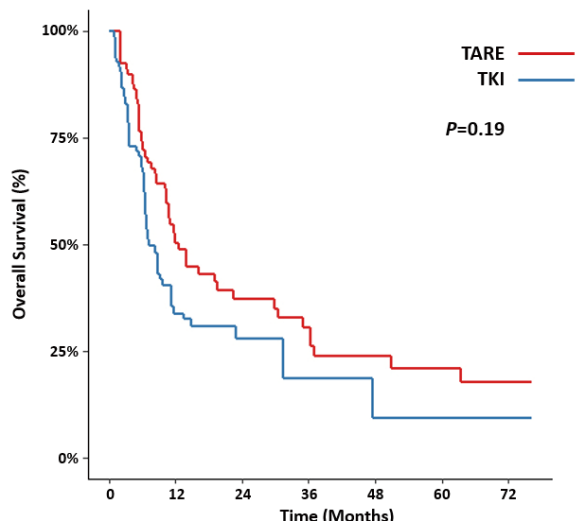

Number at risk

|      |    |    |    |    |   |   |   |
|------|----|----|----|----|---|---|---|
| TARE | 62 | 34 | 15 | 10 | 6 | 4 | 2 |
| TKI  | 56 | 12 | 4  | 2  | 1 | 1 | 1 |

**D** IPTW, Vp3 subgroup

**Supplementary Figure 1.** Comparison of OS in subgroup analyses according to the level of PVTT. OS was compared between patients with Vp1 or Vp2 PVTT and those with Vp3 PVTT in an unmatched cohort (A, B) and a balanced cohort using IPTW (C, D). IPTW, inverse probability of treatment weighting; OS, overall survival; PVTT, portal vein tumor thrombosis; TARE, transarterial radioembolization; TKI, tyrosine kinase inhibitor.
